# Supplementary material
Source: publisher figshare collection journal article supplement (https://tandf.figshare.com/articles/dataset/_/5346076)
Supplement: Supplementary file 1 [file 1]

| **Specimen Number** | **Sex** | **Male Handedness/ Larger Orbit** | **L (Length)** | **W1 (Max Width)** | **Left orbit** | **Right orbit** | **W2 (Posterior Width)** | **asymmetry (absolute difference in orbit size in mm)** | **DaL (Dactylus Length)** | **DaW (Dactylus width)** | **PrL (Propodus Length)** | **PoW (Pollex Width)** | **MaW (Manus Width)** | **Comments** |
| --- | --- | --- | --- | --- | --- | --- | --- | --- | --- | --- | --- | --- | --- | --- |
| UF 211123 | Female |  |  | 14.22 |  |  |  | no |  |  |  |  |  |  |
| UF 210303 | Female |  | 24.61 | 16.36 |  |  | 19.97 | no |  |  |  |  |  |  |
| UF 206058 | Female |  | 14.90 | 19.88 |  |  | 13.50 | no |  |  |  |  |  |  |
| UF 210339 | Female |  | 16.97 | 22.34 |  |  | 12.60 | no |  |  |  |  |  |  |
| UF 210473 | Female |  | 17.19 | 22.66 | 11.33 | 11.33 | 14.09 |  |  |  |  |  |  |  |
| UF 210302 | Female |  | 17.40 | 22.88 |  |  | 12.40 | no |  |  |  |  |  |  |
| UF 210310 | Female |  | 17.63 | 23.06 |  |  | 13.00 | no |  |  |  |  |  |  |
| UF 210529 | Female |  | 19.07 | 23.30 |  |  | 14.00 | no |  |  |  |  |  |  |
| UF 212211 | Female |  | 20.07 | 24.06 |  |  | 7.20 | no |  |  |  |  |  |  |
| UF 206079 | Female |  | 17.50 | 24.19 |  |  | 13.50 | no |  |  |  |  |  |  |
| UF 210507 | Female |  |  | 24.81 |  |  |  | no |  |  |  |  |  |  |
| UF 211951 | Female |  |  | 24.94 |  |  |  | no |  |  |  |  |  |  |
| UF 210476 | Female |  |  | 25.41 |  |  |  | no |  |  |  |  |  |  |
| UF 210502 | Female |  | 19.69 | 25.99 |  |  | 15.74 | no |  |  |  |  |  |  |
| UF 211140 | Female |  | 20.88 | 26.58 |  |  | 13.70 | no |  |  |  |  |  |  |
| UF 212201 | Female |  | 20.46 | 26.78 |  |  | 14.60 | no |  |  |  |  |  |  |
| UF 210527 | Female |  | 20.26 | 26.80 | 13.40 | 13.40 |  |  |  |  |  |  |  |  |
| UF 211145 | Female |  | 21.02 | 26.95 |  |  | 14.50 | no |  |  |  |  |  |  |
| UF 210337 | Female |  | 21.57 | 27.16 |  |  | 14.74 | no |  |  |  |  |  |  |
| UF 206070 | Female |  | 21.29 | 27.30 |  |  | 15.50 | no |  |  |  |  |  |  |
| UF 210328 | Female |  | 20.61 | 27.43 |  |  | 15.21 | no |  |  |  |  |  |  |
| UF 206063 | Female |  |  | 27.58 |  |  |  | no |  |  |  |  |  |  |
| UF 210323 | Female |  | 21.60 | 27.62 |  |  | 14.80 | no |  |  |  |  |  |  |
| UF 210318 | Female |  | 21.00 | 27.94 |  |  | 15.80 | no |  |  |  |  |  |  |
| UF 212209 | Female |  | 21.60 | 28.05 |  |  | 18.54 | no |  |  |  |  |  |  |
| UF 212206 | Female |  | 22.11 | 28.45 |  |  | 15.00 | no |  |  |  |  |  |  |
| UF 212220 | Female |  | 24.62 | 28.60 |  |  | 19.54 | no |  |  |  |  |  |  |
| UF 211124 | Female |  | 21.84 | 28.85 |  |  | 14.50 | no |  |  |  |  |  |  |
| UF 212213 | Female |  | 23.00 | 29.00 |  |  | 18.98 | no |  |  |  |  |  |  |
| UF 212141 | Female |  |  | 29.00 | 14.50 | 14.50 |  |  |  |  |  |  |  |  |
| UF 211116 | Female |  | 22.20 | 29.07 |  |  |  | no |  |  |  |  |  |  |
| UF 212208 | Female |  | 23.00 | 29.10 |  |  | 16.35 | no |  |  |  |  |  |  |
| UF 212218 | Female |  | 22.54 | 29.16 |  |  | 17.47 | no |  |  |  |  |  |  |
| UF 210311 | Female |  | 21.57 | 29.24 |  |  | 15.90 | no |  |  |  |  |  |  |
| UF 210504 | Female |  | 22.53 | 29.28 |  |  | 15.86 | no |  |  |  |  |  |  |
| UF 206056 | Female |  | 23.39 | 29.32 |  |  | 19.70 | no |  |  |  |  |  |  |
| UF 211131 | Female |  | 22.11 | 29.50 |  |  |  | no |  |  |  |  |  |  |
| UF 206074 | Female |  | 21.46 | 29.60 |  |  | 16.60 | no |  |  |  |  |  |  |
| UF 210470 | Female |  | 22.24 | 29.63 |  |  | 17.66 | no |  |  |  |  |  |  |
| UF 210320 | Female |  | 22.00 | 29.73 |  |  | 17.00 | no |  |  |  |  |  |  |
| UF 210324 | Female |  | 23.65 | 30.00 |  |  | 20.00 | no |  |  |  |  |  |  |
| UF 210336 | Female |  | 22.47 | 30.48 | 15.24 | 15.24 | 17.10 |  |  |  |  |  |  |  |
| UF 212198 | Female |  | 24.00 | 30.90 |  |  | 20.88 | no |  |  |  |  |  |  |
| UF 206083 | Female |  | 22.77 | 30.95 |  |  | 18.40 | no |  |  |  |  |  |  |
| UF 206078 | Female |  | 23.38 | 30.98 |  |  | 18.39 | no |  |  |  |  |  |  |
| UF 210472 | Female |  | 23.87 | 31.00 |  |  |  | no |  |  |  |  |  |  |
| UF 206059 | Female |  | 24.24 | 31.01 |  |  |  | no |  |  |  |  |  |  |
| UF 210514 | Female |  | 21.88 | 31.16 |  |  |  | no |  |  |  |  |  |  |
| UF 210505 | Female |  |  | 31.44 |  |  |  | no |  |  |  |  |  |  |
| UF 210317 | Female |  | 24.33 | 31.46 |  |  | 17.98 | no |  |  |  |  |  |  |
| UF 211126 | Female |  | 25.55 | 31.52 |  |  |  | no |  |  |  |  |  |  |
| UF 210307 | Female |  |  | 31.69 |  |  |  | no |  |  |  |  |  |  |
| UF 210479 | Female |  | 26.07 | 31.77 |  |  | 17.50 | no |  |  |  |  |  |  |
| UF 211128 | Female |  | 24.53 | 31.78 |  |  | 17.00 | no |  |  |  |  |  |  |
| UF 212222 | Female |  | 26.00 | 32.10 |  |  | 16.66 | no |  |  |  |  |  |  |
| UF 210327 | Female |  | 27.51 | 32.34 |  |  | 22.30 | no |  |  |  |  |  |  |
| UF 212112 | Female |  |  | 32.50 |  |  |  | no |  |  |  |  |  |  |
| UF 206084 | Female |  | 24.97 | 32.89 |  |  | 20.33 | no |  |  |  |  |  |  |
| UF 212200 | Female |  | 28.00 | 34.30 |  |  | 19.96 | no |  |  |  |  |  |  |
| UF 210331 | Female |  | 24.18 | 34.34 |  |  | 21.34 | no |  |  |  |  |  |  |
| UF 210334 | Female |  | 26.00 | 34.36 |  |  | 17.50 | no |  |  |  |  |  |  |
| UF 206046 | Female |  | 26.05 | 34.64 |  |  |  | no |  |  |  |  |  |  |
| UF 210297 | Female |  | 27.24 | 34.98 |  |  | 21.00 | no |  |  |  |  |  |  |
| UF 211144 | Female |  |  | 35.34 |  |  |  | no |  |  |  |  |  |  |
| UF 211141 | Female |  |  | 35.42 |  |  |  | no |  |  |  |  |  |  |
| UF 212204 | Female |  | 27.98 | 35.77 |  |  | 24.50 | no |  |  |  |  |  |  |
| UF 210513 | Female |  | 27.91 | 36.59 |  |  | 20.65 | no |  |  |  |  |  |  |
| UF 212199 | Female |  | 30.60 | 37.67 |  |  | 22.40 | no |  |  |  |  |  |  |
| UF 210482 | Female |  | 29.00 | 38.20 |  |  | 21.90 | no |  |  |  |  |  |  |
| UF 210480 | Female |  |  |  |  |  |  | no |  |  |  |  |  |  |
| UF 212221 | Female |  |  |  |  |  | 19.89 | no |  |  |  |  |  |  |
| UF 212219 | Female |  |  |  |  |  |  | no |  |  |  |  |  |  |
| UF 212217 | Female |  |  |  |  |  |  | no |  |  |  |  |  |  |
| UF 212216 | Female |  |  |  |  |  |  | no |  |  |  |  |  |  |
| UF 212212 | Female |  |  |  |  |  |  | no |  |  |  |  |  |  |
| UF 212203 | Female |  | 23.20 |  |  |  |  | no |  |  |  |  |  |  |
| UF 212119 | Female |  |  |  |  |  |  | no |  |  |  |  |  |  |
| UF 211953 | Female |  | 17.56 |  |  |  |  | no |  |  |  |  |  |  |
| UF 211952 | Female |  | 25.50 |  |  |  | 17.72 | no |  |  |  |  |  |  |
| UF 211149 | Female |  |  |  |  |  |  | no |  |  |  |  |  |  |
| UF 211129 | Female |  |  |  |  |  |  | no |  |  |  |  |  |  |
| UF 211122 | Female |  |  |  |  |  |  | no |  |  |  |  |  |  |
| UF 210512 | Female |  |  |  |  |  |  | no |  |  |  |  |  |  |
| UF 210509 | Female |  |  |  |  |  |  | no |  |  |  |  |  |  |
| UF 210506 | Female |  |  |  |  |  |  | no |  |  |  |  |  |  |
| UF 210500 | Female |  |  |  |  |  |  | no |  |  |  |  |  |  |
| UF 210465 | Female |  |  |  |  |  |  | no |  |  |  |  |  |  |
| UF 210319 | Female |  |  |  |  |  |  | no |  |  |  |  |  |  |
| UF 210309 | Female |  | 22.50 |  |  |  |  | no |  |  |  |  |  |  |
| UF 210306 | Female |  |  |  |  |  |  | no |  |  |  |  |  |  |
| UF 206076 | Female |  |  |  |  |  |  | no |  |  |  |  |  |  |
| UF 206068 | Female |  |  |  |  |  |  | no |  |  |  |  |  |  |
| UF 206065 | Female |  |  |  |  |  |  | no |  |  |  |  |  |  |
| UF 210478 | Female |  | 15.16 | 20.20 |  | 10.10 | 12.20 | no |  |  |  |  |  |  |
| UF 210321 | Female |  | 15.77 | 23.60 | 11.80 |  | 13.20 | no |  |  |  |  |  |  |
| UF 210503 | Female |  | 17.76 | 24.68 |  | 12.34 |  | no |  |  |  |  |  |  |
| UF 212202 | Female |  | 18.84 | 25.20 | 12.60 |  | 12.66 | no |  |  |  |  |  |  |
| UF 210464 | Female |  | 19.25 | 25.20 | 12.60 |  | 14.60 | no |  |  |  |  |  |  |
| UF 210508 | Female |  | 18.13 | 26.92 | 13.46 |  | 17.44 | no |  |  |  |  |  |  |
| UF 210510 | Female |  | 20.66 | 27.60 | 13.80 |  | 15.00 | no |  |  |  |  |  |  |
| UF 210312 | Female |  | 20.94 | 27.98 |  | 13.99 | 14.10 | no |  |  |  |  |  |  |
| UF 210345 | Female |  | 19.29 | 28.44 | 14.22 |  | 16.00 | no |  |  |  |  |  |  |
| UF 212214 | Female |  | 20.78 | 28.60 | 14.30 |  |  | no |  |  |  |  |  |  |
| UF 206047 | Female |  |  | 28.76 | 14.38 |  |  | no |  |  |  |  |  |  |
| UF 210314 | Female |  |  | 28.82 | 14.41 |  |  | no |  |  |  |  |  |  |
| UF 206073 | Female |  | 21.80 | 29.18 | 14.59 |  | 17.26 | no |  |  |  |  |  |  |
| UF 211127 | Female |  | 21.80 | 29.60 | 14.80 |  | 16.10 | no |  |  |  |  |  |  |
| UF 211143 | Female |  | 22.28 | 29.74 | 14.87 |  |  | no |  |  |  |  |  |  |
| UF 206049 | Female |  |  | 29.86 |  | 14.93 |  | no |  |  |  |  |  |  |
| UF 206088 | Female |  | 21.62 | 30.00 |  | 15.00 | 18.12 | no |  |  |  |  |  |  |
| UF 210308 | Female |  | 22.90 | 30.32 | 15.16 |  |  | no |  |  |  |  |  |  |
| UF 206075 | Female |  | 21.86 | 30.54 | 15.27 |  |  | no |  |  |  |  |  |  |
| UF 210325 | Female |  |  | 31.18 | 15.59 |  |  | no |  |  |  |  |  |  |
| UF 212205 | Female |  | 22.91 | 31.40 |  | 15.70 | 15.71 | no |  |  |  |  |  |  |
| UF 211125 | Female |  | 24.45 | 31.60 | 15.80 |  |  | no |  |  |  |  |  |  |
| UF 210305 | Female |  | 24.30 | 32.00 | 16.00 |  | 10.40 | no |  |  |  |  |  |  |
| UF 210511 | Female |  | 26.31 | 32.70 | 16.35 |  | 20.24 | no |  |  |  |  |  |  |
| UF 210313 | Female |  |  | 32.76 | 16.38 |  |  | no |  |  |  |  |  |  |
| UF 210322 | Female |  | 25.48 | 33.50 | 16.75 |  |  | no |  |  |  |  |  |  |
| UF 212207 | Female |  | 25.18 | 35.00 | 17.50 |  | 19.94 | no |  |  |  |  |  |  |
| UF 212197 | Female |  | 24.50 | 35.12 | 17.56 |  | 20.90 | no |  |  |  |  |  |  |
| UF 210316 | Female |  | 23.76 | 35.62 | 17.81 |  |  | no |  |  |  |  |  |  |
| UF 212215 | Female |  |  | 36.34 | 18.17 |  |  | no |  |  |  |  |  |  |
| UF 210333 | Female |  |  | 38.10 |  | 19.05 |  | no |  |  |  |  |  |  |
| UF 212210 | Female |  | 30.80 | 38.50 | 19.25 |  |  | no |  |  |  |  |  |  |
| UF 210338 | Female |  | 26.03 | 38.60 |  | 19.30 | 21.80 | no |  |  |  |  |  |  |
| UF 210315 | Female |  | 29.42 | 40.24 | 20.12 |  |  | no |  |  |  |  |  |  |
| UF 210497 | Male | Right | 17.98 | 24.00 |  |  | 13.50 | no | 16.46 |  |  |  | 8.70 |  |
| UF 206089 | Male | Right | 18.33 | 24.31 |  |  | 14.37 | no |  |  |  |  |  |  |
| UF 210300 | Male | Left | 21.70 | 26.29 |  |  |  | no |  |  |  |  |  |  |
| UF 210450 | Male | Left | 19.58 | 26.44 |  |  | 16.00 | no |  |  |  |  |  |  |
| UF 210463 | Male | Left | 18.83 | 26.65 |  |  | 15.54 | no |  |  |  |  |  |  |
| UF 212107 | Male |  |  | 27.60 |  |  | 17.00 | no |  |  |  |  |  |  |
| UF 210341 | Male | Left | 21.60 | 30.36 |  |  | 16.90 | no |  |  |  |  |  |  |
| UF 206086 | Male | Left | 20.89 | 30.44 |  |  | 16.92 | no |  |  |  |  |  |  |
| UF 210293 | Male | Right |  | 30.72 |  |  |  | no |  |  |  | 8.34 | 12.72 |  |
| UF 211121 | Male | Right | 24.44 | 31.16 |  |  |  | no |  |  | 49.54 | 10.24 |  |  |
| UF 206090 | Male | Left | 22.53 | 31.84 |  |  | 18.52 | no |  |  |  |  |  |  |
| UF 206069 | Male | Right | 23.16 | 33.78 |  |  | 17.16 | no |  |  |  |  |  |  |
| UF 211968 | Male | Left | 29.50 | 34.50 |  |  |  | no | 46.80 | 13.00 | 59.90 | 12.20 | 20.55 |  |
| UF 210483 | Male | Right | 24.39 | 34.55 |  |  | 25.76 | no |  |  | 45.57 |  | 12.82 |  |
| UF 211103 | Male | Right | 25.00 | 37.64 |  |  | 19.30 | no |  |  |  |  |  |  |
| UF 210455 | Male | Left | 29.09 | 40.86 |  |  | 21.56 | no | 39.76 | 10.48 | 53.35 |  |  |  |
| UF211960 | Male | Right |  |  |  |  |  | no |  |  |  | 13.52 |  |  |
| UF 220518 | Male |  |  |  |  |  |  | no |  |  |  |  |  |  |
| UF 212117 | Male | Left |  |  |  |  |  | no |  |  |  |  |  |  |
| UF 212116 | Male | Left |  |  |  |  |  | no |  |  |  |  |  |  |
| UF 212115 | Male | Left |  |  |  |  |  | no |  |  |  |  | 11.22 |  |
| UF 212114 | Male | Left |  |  |  |  |  | no | 18.13 |  | 24.40 |  | 9.79 |  |
| UF 212111 | Male | Left | 16.65 |  |  |  |  | no | 16.65 |  | 22.90 | 6.24 | 9.00 |  |
| UF 212109 | Male | Left | 18.00 |  |  |  | 13.40 | no |  |  |  |  | 10.00 |  |
| UF 212108 | Male | Left |  |  |  |  |  | no |  |  |  |  |  |  |
| UF 212106 | Male | Right |  |  |  |  |  | no | 30.18 |  | 41.00 |  | 14.00 |  |
| UF 212102 | Male | Left |  |  |  |  |  | no |  |  |  |  |  |  |
| UF 212101 | Male | Right |  |  |  |  |  | no |  |  |  |  |  |  |
| UF 212100 | Male | Left |  |  |  |  |  | no |  |  |  |  | 20.80 |  |
| UF 212098 | Male | Right |  |  |  |  |  | no |  |  |  |  |  |  |
| UF 212096 | Male | Left |  |  |  |  |  | no |  |  |  |  | 12.50 |  |
| UF 212095 | Male | Right |  |  |  |  |  | no | 36.23 | 9.00 | 45.93 |  | 16.60 |  |
| UF 212093 | Male |  | 24.10 |  |  |  | 20.66 | no |  |  |  |  |  |  |
| UF 212091 | Male | Left |  |  |  |  |  | no |  |  |  |  | 15.60 |  |
| UF 212090 | Male | Left |  |  |  |  |  | no |  |  |  |  |  |  |
| UF 212089 | Male | Right |  |  |  |  |  | no | 47.60 |  | 62.44 |  |  |  |
| UF 212085 | Male | Right |  |  |  |  |  | no | 46.92 |  | 61.10 |  | 19.70 |  |
| UF 211983 | Male | Left |  |  |  |  |  | no |  |  | 41.60 | 9.28 | 12.88 |  |
| UF 211981 | Male | Right |  |  |  |  |  | no | 39.08 |  | 52.24 |  | 17.32 |  |
| UF 211978 | Male | Right |  |  |  |  |  | no | 35.70 |  | 46.95 | 11.71 | 15.87 |  |
| UF 211970 | Male |  |  |  |  |  |  | no |  |  |  |  |  |  |
| UF 211969 | Male |  |  |  |  |  |  | no |  |  |  |  |  |  |
| UF 211967 | Male | Right |  |  |  |  |  | no |  | 18.28 |  |  |  |  |
| UF 211966 | Male |  |  |  |  |  |  | no |  |  |  |  |  |  |
| UF 211965 | Male | Left |  |  |  |  |  | no |  |  |  |  |  |  |
| UF 211964 | Male |  |  |  |  |  |  | no |  |  |  |  |  |  |
| UF 211963 | Male | Left |  |  |  |  |  | no |  |  |  |  | 11.75 |  |
| UF 211962 | Male | Right |  |  |  |  |  | no |  |  |  | 16.00 | 14.19 |  |
| UF 211959 | Male | Left |  |  |  |  |  | no |  |  |  |  | 23.00 |  |
| UF 211958 | Male | Right |  |  |  |  |  | no |  |  |  |  |  |  |
| UF 211957 | Male | Right |  |  |  |  |  | no |  | 14.70 |  | 14.50 | 22.29 |  |
| UF 211956 | Male | Left |  |  |  |  |  | no | 54.38 | 14.92 |  |  |  |  |
| UF 211955 | Male | Left |  |  |  |  |  | no |  |  |  |  |  |  |
| UF 211954 | Male | Left |  |  |  |  |  | no |  | 13.50 |  |  |  |  |
| UF 211177 | Male | Right | 23.98 |  |  |  |  | no | 30.63 | 7.28 | 42.47 | 8.85 | 14.78 |  |
| UF 211135 | Male | Right | 13.82 |  |  |  |  | no |  |  |  |  |  |  |
| UF 211115 | Male | Right |  |  |  |  |  | no |  |  |  |  |  |  |
| UF 211113 | Male | Right |  |  |  |  |  | no |  |  |  |  |  |  |
| UF 211111 | Male | Left |  |  |  |  |  | no |  |  |  |  | 11.23 |  |
| UF 211110 | Male | Left |  |  |  |  |  | no |  |  |  |  |  |  |
| UF 211107 | Male | Left |  |  |  |  |  | no |  |  | 23.30 | 6.08 |  |  |
| UF 211106 | Male | Right |  |  |  |  |  | no |  |  |  |  |  |  |
| UF 211105 | Male |  |  |  |  |  |  | no |  |  |  |  |  |  |
| UF 210553 | Male | Right |  |  |  |  |  | no |  | 14.38 |  |  |  |  |
| UF 210552 | Male | Left |  |  |  |  |  | no |  |  |  |  | 17.76 |  |
| UF 210551 | Male | Right |  |  |  |  |  | no |  |  |  |  |  |  |
| UF 210550 | Male | Right |  |  |  |  |  | no | 50.50 | 15.60 |  |  |  |  |
| UF 210534 | Male |  |  |  |  |  |  | no |  |  |  |  |  |  |
| UF 210521 | Male |  |  |  |  |  |  | no |  |  |  |  |  |  |
| UF 210520 | Male | Left |  |  |  |  |  | no |  |  |  |  |  |  |
| UF 210519 | Male | Right |  |  |  |  |  | no |  |  |  |  |  |  |
| UF 210517 | Male | Left | 14.50 |  |  |  |  | no |  |  |  |  |  |  |
| UF 210498 | Male |  | 22.85 |  |  |  |  | no |  |  |  |  |  |  |
| UF 210494 | Male | Right |  |  |  |  |  | no |  |  |  |  |  |  |
| UF 210493 | Male | Left |  |  |  |  |  | no |  |  |  |  |  |  |
| UF 210487 | Male | Right |  |  |  |  |  | no |  |  | 42.88 |  |  |  |
| UF 210485 | Male | Left |  |  |  |  |  | no |  |  |  |  |  |  |
| UF 210475 | Male | Left |  |  |  |  |  | no |  |  |  |  | 15.48 |  |
| UF 210469 | Male |  |  |  |  |  |  | no |  |  |  |  |  |  |
| UF 210468 | Male |  |  |  |  |  |  | no |  |  |  |  |  |  |
| UF 210466 | Male | Right |  |  |  |  |  | no |  |  |  |  |  |  |
| UF 210462 | Male | Left |  |  |  |  |  | no | 25.28 |  | 37.75 |  |  |  |
| UF 210461 | Male | Left |  |  |  |  |  | no |  |  | 59.55 | 15.00 |  |  |
| UF 210460 | Male | Left |  |  |  |  |  | no | 14.70 |  |  | 5.25 |  |  |
| UF 210459 | Male | Right |  |  |  |  |  | no |  |  |  |  |  |  |
| UF 210458 | Male | Left |  |  |  |  |  | no |  | 15.17 |  | 15.85 | 21.34 |  |
| UF 210457 | Male | Left |  |  |  |  |  | no | 38.43 | 8.00 | 49.67 | 10.00 | 16.54 |  |
| UF 210456 | Male | Left |  |  |  |  |  | no |  |  | 49.87 |  |  |  |
| UF 210452 | Male | Left |  |  |  |  |  | no | 16.54 | 5.03 | 22.05 | 5.68 |  |  |
| UF 210451 | Male | Right |  |  |  |  |  | no | 11.70 |  | 18.00 | 4.10 | 7.58 |  |
| UF 210445 | Male | Right |  |  |  |  |  | no |  |  |  |  |  |  |
| UF 210444 | Male | Left |  |  |  |  | 16.64 | no |  |  | 25.64 | 6.18 |  |  |
| UF 210441 | Male | Left | 17.64 |  |  |  | 13.47 | no |  |  |  |  |  |  |
| UF 210439 | Male | Right |  |  |  |  |  | no |  |  |  |  |  |  |
| UF 210438 | Male | Right |  |  |  |  |  | no | 44.35 |  | 60.86 |  | 20.28 |  |
| UF 210427 | Male | Left |  |  |  |  |  | no |  |  |  |  |  |  |
| UF 210344 | Male | Left |  |  |  |  |  | no |  |  | 53.38 | 13.68 | 19.34 |  |
| UF 210343 | Male | Right |  |  |  |  |  | no |  |  |  |  |  |  |
| UF 210340 | Male | Right |  |  |  |  |  | no |  |  |  |  |  |  |
| UF 210304 | Male | Right | 20.71 |  |  |  | 14.40 | no |  |  | 22.90 | 7.80 |  |  |
| UF 210301 | Male | Left | 23.94 |  |  |  |  | no |  |  |  |  |  |  |
| UF 210299 | Male | Right |  |  |  |  |  | no |  |  |  |  |  |  |
| UF 210295 | Male | Right |  |  |  |  |  | no | 26.06 | 6.43 | 37.00 | 8.76 | 14.79 |  |
| UF 210294 | Male | Left |  |  |  |  |  | no | 46.68 |  | 50.21 |  | 17.35 |  |
| UF 210292 | Male | Right |  |  |  |  |  | no |  |  |  |  |  |  |
| UF 210290 | Male | Right | 20.21 |  |  |  | 18.30 | no | 18.40 |  | 28.85 |  | 10.66 |  |
| UF 210084 | Male | Left |  |  |  |  |  | no |  |  |  |  |  |  |
| UF 206077 | Male | Right |  |  |  |  |  | no |  |  |  |  |  |  |
| UF 206072 | Male |  |  |  |  |  |  | no |  |  |  |  |  |  |
| UF 206060 | Male | Right |  |  |  |  |  | no |  |  |  |  |  |  |
| UF 206055 | Male | Right |  |  |  |  |  | no |  |  |  |  | 17.39 |  |
| UF 206054 | Male | Right |  |  |  |  |  | no | 35.22 |  | 48.97 | 10.45 | 16.03 |  |
| UF 206048 | Male | Right |  |  |  |  |  | no |  |  | 66.60 |  | 24.88 |  |
| UF 212118 | Male | Right | 21.80 | 27.10 | 13.13 | 13.97 |  | 0.84 |  |  |  |  |  |  |
| UF 212113 | Male | Left | 16.70 | 23.74 | 12.30 | 11.44 |  | 0.86 |  |  |  |  |  |  |
| UF 212103 | Male | Right | 17.11 | 25.13 | 12.13 | 13.00 |  | 0.87 |  |  |  |  | 9.07 |  |
| UF 206061 | Male | Right |  | 19.77 | 10.33 | 9.44 |  | 0.89 | 9.23 | 2.49 | 13.88 |  | 5.48 |  |
| UF 210454 | Male | Left | 14.21 | 21.65 | 11.29 | 10.36 | 11.34 | 0.93 |  |  |  |  | 0.94 |  |
| UF 211984 | Male | Right | 20.86 | 29.40 | 14.20 | 15.20 | 14.20 | 1.00 | 23.80 |  | 33.00 |  | 12.21 |  |
| UF 212087 | Male | Left | 20.64 | 28.80 | 14.91 | 13.89 | 16.56 | 1.02 |  |  |  |  | 12.61 |  |
| UF 206057 | Male | Left | 17.75 | 26.43 | 13.80 | 12.63 | 14.80 | 1.17 |  |  |  |  |  |  |
| UF 210488 | Male | Left | 20.40 | 30.50 | 15.85 | 14.65 |  | 1.20 | 23.21 |  |  | 8.90 |  |  |
| UF 210298 | Male | Right | 24.59 | 34.80 | 16.80 | 18.00 |  | 1.20 | 31.82 |  |  |  |  |  |
| UF 206066 | Male | Left | 15.56 | 23.27 | 12.24 | 11.03 | 11.32 | 1.21 |  |  |  |  |  |  |
| UF 210523 | Male | Right |  | 23.60 | 11.15 | 12.45 |  | 1.30 |  |  |  |  |  |  |
| UF 212097 | Male | Right |  | 29.46 |  | 15.45 |  | no |  |  |  |  |  |  |
| UF 206080 | Male | Right | 20.63 | 28.40 | 13.46 | 14.94 | 15.84 | 1.48 |  |  |  |  | 7.00 |  |
| UF 206067 | Male | Left | 19.50 | 27.28 | 14.40 | 12.88 |  | 1.52 | 11.66 | 2.85 | 14.96 |  | 5.90 |  |
| UF 211980 | Male | Left | 22.80 | 32.22 | 16.90 | 15.32 |  | 1.58 |  |  |  |  | 17.80 |  |
| UF 212123 | Male | Right |  | 23.12 | 10.74 | 12.38 |  | 1.64 |  |  |  |  |  |  |
| UF 212110 | Male | Right |  | 27.98 | 13.17 | 14.81 |  | 1.64 |  |  |  |  | 10.90 |  |
| UF 211976 | Male | Left | 24.00 | 36.85 | 19.27 | 17.58 | 20.80 | 1.69 |  |  |  |  |  |  |
| UF 211979 | Male | Left | 27.00 | 38.46 | 20.10 | 18.36 | 19.21 | 1.74 |  |  |  |  |  |  |
| UF 211117 | Male | Left | 19.00 | 27.00 | 14.41 | 12.59 |  | 1.82 |  |  |  |  | 9.89 |  |
| UF 212135 | Male | Left | 30.00 | 42.17 | 22.00 | 20.17 | 26.00 | 1.83 |  |  |  |  |  |  |
| UF 211120 | Male | Right |  | 37.56 | 17.80 | 19.76 |  | 1.96 |  |  |  |  | 16.47 |  |
| UF 212088 | Male | Left | 23.75 | 38.86 | 20.43 | 18.43 |  | 2.00 |  |  |  |  |  |  |
| UF 210491 | Male | Right | 20.74 | 28.73 | 13.32 | 15.41 | 14.47 | 2.09 | 26.64 | 6.00 | 37.13 | 6.73 | 12.22 |  |
| UF 210488 | Male | Left | 29.47 | 42.17 | 22.17 | 20.00 | 19.02 | 2.17 |  |  |  |  |  |  |
| UF 211118 | Male | Left |  | 32.40 | 17.30 | 15.10 |  | 2.20 | 26.36 |  |  |  |  |  |
| UF 211109 | Male | Left | 18.79 | 28.30 | 15.30 | 13.00 | 16.00 | 2.30 |  |  |  |  | 11.00 |  |
| UF 211148 | Male | Right | 23.95 | 29.98 | 13.59 | 16.39 | 21.17 | 2.80 |  |  |  |  |  |  |
| UF 210291 | Male | Right | 24.82 | 37.15 | 17.15 | 20.00 | 20.22 | 2.85 | 34.88 |  | 52.29 |  | 12.74 |  |
| UF 210490 | Male | Right | 25.23 | 38.50 | 17.17 | 21.33 | 24.15 | 4.16 |  |  |  |  |  |  |
| UF 211975 | Male | Right |  | 40.86 | 18.26 | 22.60 |  | 4.34 |  |  |  |  | 21.28 |  |
| UF 210501 | Male | Right |  | 21.16 | 9.26 | 11.90 |  | 2.64 |  |  |  |  |  |  |
| UF 210443 | Male | Left | 16.90 | 23.60 | 13.51 | 10.09 |  | 3.42 |  |  |  |  |  |  |
| UF 210446 | Male | Right | 18.37 | 21.63 | 8.83 | 12.80 |  | 3.97 | 15.98 | 4.59 | 23.45 | 4.69 | 8.17 |  |
| UF 210499 | Male | Left | 15.24 |  |  | 11.12 |  | no | 12.80 | 2.50 | 18.65 | 4.88 | 6.46 |  |
| UF 211961 | Male | Left |  |  |  | 12.39 |  | no |  |  |  |  |  |  |
| UF 210453 | Male | Right | 21.60 |  | 14.40 |  |  | no |  |  |  |  |  |  |
| UF 210489 | Male | Left | 19.12 |  | 14.60 |  | 17.52 | no |  |  |  |  |  |  |
| UF 206062 | Male | Left | 20.37 |  | 14.81 |  |  | no | 18.25 |  |  |  | 8.94 |  |
| UF 210492 | Male | Left | 22.47 |  |  | 14.90 | 15.73 | no |  |  | 37.78 |  |  |  |
| UF 206082 | Male | Right |  |  |  | 15.00 |  | no | 20.05 |  | 30.80 |  |  |  |
| UF 210449 | Male | Right | 20.71 |  |  | 15.17 | 16.60 | no |  |  |  |  |  |  |
| UF 212094 | Male | Left | 19.35 |  | 15.21 |  | 16.90 | no | 23.11 |  | 31.66 | 7.50 | 12.24 |  |
| UF 211119 | Male | Left |  |  | 15.21 |  | 16.90 | no |  |  |  |  |  |  |
| UF 210386 | Male | Left | 18.66 |  | 15.35 |  |  | no | 22.72 | 8.16 | 37.40 |  | 11.18 |  |
| UF 210496 | Male | Right | 19.80 |  |  | 15.40 | 16.60 | no |  | 5.50 |  |  | 11.73 |  |
| UF 210495 | Male | Right | 20.00 |  |  | 16.35 | 16.41 | no |  |  |  |  | 12.82 |  |
| UF 210296 | Male | Right |  |  |  | 16.40 |  | no | 27.32 |  | 37.52 | 7.75 | 14.48 |  |
| UF 210471 | Male | Left | 19.67 | 32.40 | 16.42 |  | 16.32 | no |  |  |  |  |  |  |
| UF 211985 | Male | Right | 23.84 |  |  | 16.80 |  | no | 32.72 |  | 44.39 |  | 15.68 |  |
| UF 211114 | Male | Right | 23.44 |  |  | 16.83 |  | no | 33.89 |  | 49.45 |  | 15.90 |  |
| UF 212105 | Male | Left | 21.56 |  | 16.95 |  | 14.25 | no |  |  |  |  | 11.00 |  |
| UF 211986 | Male | Left | 24.20 |  | 17.00 |  | 18.26 | no |  |  |  |  |  |  |
| UF 210442 | Male | Right | 21.15 |  |  | 17.43 |  | no | 22.71 |  |  |  |  |  |
| UF 211982 | Male | Left | 23.30 |  | 17.90 |  | 19.40 | no | 31.68 |  | 40.00 | 9.14 | 15.05 |  |
| UF 212092 | Male | Left | 24.27 | 36.84 | 19.60 |  | 17.95 | no |  |  |  |  |  |  |
| UF 212086 | Male | Left | 25.64 |  | 19.90 |  | 22.26 | no | 35.84 |  | 46.20 |  |  |  |
| UF 212104 | Male | Left | 30.10 |  |  | 20.70 | 22.00 | no |  |  |  |  |  |  |
| UF 211112 | Male | Right |  |  |  | 24.48 |  | no |  |  |  |  | 21.18 |  |
| UF 211104 | Male | Right | 30.10 |  |  | 24.79 | 24.60 | no |  |  |  |  | 21.00 |  |
| UF 210447 | Male | Left | 18.57 |  |  | 27.71 | 10.88 |  | 17.50 |  | 23.63 | 4.60 | 9.67 |  |
| UF 210518 |  | Left | 26.07 | 38.41 |  |  |  | no |  |  |  |  |  |  |
| UF 210440 |  |  |  |  |  |  |  | no |  |  |  |  |  |  |
| UF 210626 |  |  | 15.66 | 20.44 |  |  | 6.60 | no |  |  |  |  |  |  |
| UF 206091 |  |  | 15.64 | 21.10 |  |  | 12.12 | no |  |  |  |  |  |  |
| UF 206050 |  |  | 15.33 | 22.00 |  |  | 15.00 | no |  |  |  |  |  |  |
| UF 206064 |  |  | 17.68 | 24.95 |  |  | 12.96 | no |  |  |  |  |  |  |
| UF 206052 |  |  | 19.75 | 25.92 |  |  | 17.55 | no |  |  |  |  |  |  |
| UF 206071 |  |  | 21.84 | 26.32 |  |  |  | no |  |  |  |  |  |  |
| UF 212140 |  |  | 21.50 | 26.62 |  |  | 14.90 | no |  |  |  |  |  |  |
| UF 206087 |  |  | 22.48 | 30.11 |  |  | 18.16 | no |  |  |  |  |  |  |
| UF 210342 |  |  |  | 30.50 |  |  |  | no |  |  |  |  |  |  |
| UF 212124 |  |  | 23.00 | 30.95 |  |  | 17.20 | no |  |  |  |  |  |  |
| UF 206051 |  |  | 23.31 | 32.84 |  |  | 20.49 | no |  |  |  |  |  |  |
| UF 210481 |  |  |  | 33.32 |  |  |  | no |  |  |  |  |  |  |
| UF 210335 |  |  | 25.41 | 33.47 |  |  |  | no |  |  |  |  |  |  |
| UF 210326 |  |  | 26.14 | 33.58 |  |  | 14.96 | no |  |  |  |  |  |  |
| UF 212121 |  |  |  | 33.60 |  |  |  | no |  |  |  |  |  |  |
| UF 210525 |  |  | 26.49 | 36.69 |  |  | 23.36 | no |  |  |  |  |  |  |
| UF 212137 |  |  |  | 39.75 |  |  |  | no |  |  |  |  |  |  |
| UF 223087 |  |  |  |  |  |  |  | no |  |  |  |  |  |  |
| UF 220517 |  |  |  |  |  |  |  | no |  |  |  |  |  |  |
| UF 212138 |  |  |  |  |  |  |  | no |  |  |  |  |  |  |
| UF 212136 |  |  |  |  |  |  | 20.00 | no |  |  |  |  |  |  |
| UF 212133 |  |  |  |  |  |  |  | no |  |  |  |  |  |  |
| UF 212132 |  |  |  |  |  |  |  | no |  |  |  |  |  |  |
| UF 212131 |  |  |  |  |  |  |  | no |  |  |  |  |  |  |
| UF 212130 |  |  |  |  |  |  |  | no |  |  |  |  |  |  |
| UF 212129 |  |  |  |  |  |  |  | no |  |  |  |  |  |  |
| UF 212128 |  |  |  |  |  |  |  | no |  |  |  |  |  |  |
| UF 212127 |  |  |  |  |  |  |  | no |  |  |  |  |  |  |
| UF 212125 |  |  |  |  |  |  |  | no |  |  |  |  |  |  |
| UF 212122 |  |  |  |  |  |  |  | no |  |  |  |  |  |  |
| UF 212120 |  |  |  |  |  |  |  | no |  |  |  |  |  |  |
| UF 211151 |  |  |  |  |  |  |  | no |  |  |  |  |  |  |
| UF 211150 |  |  |  |  |  |  |  | no |  |  |  |  |  |  |
| UF 211147 |  |  |  |  |  |  |  | no |  |  |  |  |  |  |
| UF 211146 |  |  |  |  |  |  |  | no |  |  |  |  |  |  |
| UF 211139 |  |  |  |  |  |  |  | no |  |  |  |  |  |  |
| UF 211138 |  |  |  |  |  |  |  | no |  |  |  |  |  |  |
| UF 211137 |  |  |  |  |  |  |  | no |  |  |  |  |  |  |
| UF 211134 |  |  |  |  |  |  |  | no |  |  |  |  |  |  |
| UF 211133 |  |  |  |  |  |  |  | no |  |  |  |  |  |  |
| UF 211130 |  |  |  |  |  |  |  | no |  |  |  |  |  |  |
| UF 211108 |  |  |  |  |  |  |  | no |  |  |  |  |  |  |
| UF 210539 |  |  |  |  |  |  |  | no |  |  |  |  |  |  |
| UF 210538 |  |  |  |  |  |  |  | no |  |  |  |  |  |  |
| UF 210537 |  |  |  |  |  |  |  | no |  |  |  |  |  |  |
| UF 210536 |  |  |  |  |  |  |  | no |  |  |  |  |  |  |
| UF 210535 |  |  |  |  |  |  |  | no |  |  |  |  |  |  |
| UF 210532 |  |  |  |  |  |  |  | no |  |  |  |  |  |  |
| UF 210531 |  |  |  |  |  |  |  | no |  |  |  |  |  |  |
| UF 210528 |  |  |  |  |  |  |  | no |  |  |  |  |  |  |
| UF 210524 |  |  |  |  |  |  |  | no |  |  |  |  |  |  |
| UF 210522 |  |  |  |  |  |  |  | no |  |  |  |  |  |  |
| UF 210515 |  |  |  |  |  |  |  | no |  |  |  |  |  |  |
| UF 210477 |  |  |  |  |  |  |  | no |  |  |  |  |  |  |
| UF 210474 |  |  | 30.65 |  |  |  |  | no |  |  |  |  |  |  |
| UF 210332 |  |  |  |  |  |  |  | no |  |  |  |  |  |  |
| UF 210330 |  |  |  |  |  |  |  | no |  |  |  |  |  |  |
| UF 210329 |  |  | 14.75 |  |  |  | 9.95 | no |  |  |  |  |  |  |
| UF 210326 |  |  |  |  |  |  |  | no |  |  |  |  |  |  |
| UF 206085 |  |  |  |  |  |  |  | no |  |  |  |  |  |  |
| UF 206081 |  |  |  |  |  |  |  | no |  |  |  |  |  |  |
| UF 211142 |  |  |  |  | 10.48 |  |  | no |  |  |  |  |  |  |
| UF 212099 |  |  | 16.38 |  |  | 10.54 | 11.30 | no |  |  |  |  |  |  |
| UF 212139 |  |  | 16.69 |  | 10.64 |  |  | no |  |  |  |  |  |  |
| UF 212134 |  |  | 15.10 |  | 10.98 |  |  | no |  |  |  |  |  |  |
| UF 211136 |  |  | 18.82 |  |  | 12.60 | 13.00 | no |  |  |  |  |  |  |
| UF 212142 |  |  |  |  | 14.58 |  |  | no |  |  |  |  |  |  |
| UF 210530 |  |  | 21.65 |  |  | 14.72 | 16.00 | no |  |  |  |  |  |  |
| UF 210516 |  |  | 21.12 | 31.08 |  | 15.54 |  | no |  |  |  |  |  |  |
| UF 206053 |  |  |  | 32.06 | 16.03 |  |  | no |  |  |  |  |  |  |
| UF 211132 |  |  |  |  |  | 20.30 |  | no |  |  |  |  |  |  |
| UF 210533 |  |  |  |  |  | 20.39 |  | no |  |  |  |  |  |  |
| UF 249757 | Female |  | 27.48 | 35.30 |  |  | 19.37 | no |  |  |  |  |  |  |
| UF 249759 |  |  | 23.55 | 33.00 |  |  | 17.92 | no |  |  |  |  |  |  |
| UF 249761 |  |  |  |  |  | 14.00 | 15.00 | no |  |  |  |  |  |  |
| UF 249762 | Female |  | 21.79 | 29.80 |  |  | 17.40 | no |  |  |  |  |  |  |
| UF 249765 | Male | Right | 21.20 | 30.90 | 14.90 | 16.00 |  |  |  |  |  |  |  |  |
| UF 249767 | Female |  | 25.19 | 32.44 | 16.22 | 16.22 | 18.13 | no |  |  |  |  |  |  |
| UF 249769 | Female |  | 22.13 | 28.59 |  |  | 17.44 | no |  |  |  |  |  |  |
| UF 249770 | Male | Right | 22.59 |  |  |  |  |  |  |  |  |  |  |  |
| UF 249771 | Female |  |  |  | 20.00 |  |  | no |  |  |  |  |  |  |
| UF 249772 | Female |  | 26.58 | 35.43 |  |  | 19.00 | no |  |  |  |  |  |  |
| UF 249773 | Female |  | 23.60 | 30.00 |  |  | 17.40 |  |  |  |  |  |  |  |
| UF 249770 | Male | Right | 22.49 | 30.91 | 15.04 | 16.26 |  |  |  |  |  |  |  |  |
| UF 249757 | Female |  | 27.37 | 35.26 | 17.73 | 17.81 | 19.16 |  |  |  |  |  |  |  |
| UF 249767 | Female |  | 28.58 | 32.28 | 15.75 | 16.03 | 18.04 |  |  |  |  |  |  |  |
| UF 249773 | Female |  | 23.30 | 28.91 |  |  | 15.02 |  |  |  |  |  |  |  |
| UF 249771 | Female |  |  |  | 20.39 |  |  |  |  |  |  |  |  |  |
| UF 249772 | Female |  | 26.75 | 35.00 |  |  |  |  |  |  |  |  |  |  |
| UF 249761 |  |  | 20.39 |  |  | 13.39 | 13.28 |  |  |  |  |  |  |  |
| UF 249759 | Female |  |  |  |  |  |  |  |  |  |  |  |  |  |
| UF 249765 | Male | Right |  | 30.46 | 15.16 | 15.70 | 17.87 |  |  |  |  |  |  |  |
| UF 299762 | Female |  | 21.90 | 28.27 |  |  | 16.24 |  |  |  |  |  |  |  |
| UF 249769 | Female |  | 21.20 | 28.32 | 13.71 | 13.76 | 15.35 |  |  |  |  |  |  |  |
| CH01-001 | Male | Left | 26.90 | 41.52 | 22.38 | 18.98 | 18.10 |  | 56.43 | 15.86 | 69.57 | 16.06 | 24.16 | Extant male from Punta Chame, in EtOH 70%. Uncatalogued |
| CH01-002 | Male | Right | 25.05 | 38.88 | 17.58 | 21.30 | 19.92 |  | 46.15 | 12.63 | 56.40 | 12.24 | 19.16 | Extant male from Punta Chame, in EtOH 70%. Uncatalogued |
| CH01-003 | Male | Right | 27.04 | 43.38 | 19.37 | 23.88 | 20.66 |  | 57.79 | 14.90 | 69.40 | 14.75 | 22.48 | Extant male from Punta Chame, in EtOH 70%. Uncatalogued |
| CH01-006a | Male | Right | 24.36 | 37.79 | 16.90 | 20.76 | 17.40 |  | 47.03 | 12.11 | 58.85 | 12.07 | 19.98 | Extant male from Punta Chame, in EtOH 70%. Uncatalogued |
| CH01-004 | Female |  | 19.12 | 26.02 | 13.03 | 12.97 | 14.91 |  |  |  |  |  |  | Extant female from Punta Chame, in EtOH 70%. Uncatalogued |
| CH01-005 | Female |  | 17.84 | 24.77 | 12.40 | 12.37 | 13.65 |  |  |  |  |  |  | Extant female from Punta Chame, in EtOH 70%. Uncatalogued |
| CH01-006b | Female |  | 22.92 | 32.02 | 16.22 | 15.90 | 17.23 |  |  |  |  |  |  | Extant female from Punta Chame, in EtOH 70%. Uncatalogued |
